# Supplementary material
Source: HighWire-hosted journal article supplement (https://gh.bmj.com/content/8/1/e011242)
Supplement: inline-supplementary-material-3 [file inline-supplementary-material-3.pdf]

Cartographier le contexte de la prestation de services et les dispositions financières. Considère toute la gamme des voix des sages-femmes, en mettant l'accent sur les sages-femmes qui sont opprimées par des systèmes racistes, coloniaux, patriarcaux ou hétéronormatifs

Comprendre les défis et les solutions spécifiques pour soutenir l'intégration des compétences des sages-femmes, tout en intégrant des évaluations à forte composante explicative

## Cartographier le contexte

## Evaluation

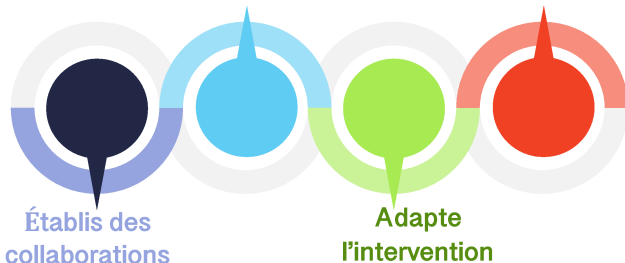

## Établir des collaborations

Loger les interventions de formation continue pour les sages-femmes au sein d'une association de sages-femmes est une approche efficace pour l'intégration à long terme des compétences et l'amélioration de la profession dans le système de santé

## Adapte l'intervention

L'adaptation du contenu selon la spécificité de la profession de sage-femme et menée par de sages-femmes.

Figure 4. Processus de planification, d'élaboration, de mise en œuvre et d'évaluation d'interventions de formation continue pour les sages-femmes en service, orientées vers la transformation du genre.
